# Supplementary material for: The energy storage behavior of a phosphate-based cathode material in rechargeable zinc batteries
Source: Royal Society of Chemistry journal article supplement (doi:10.1039/d1cc00584g), 2021-01-01
Supplement: d1cc00584g1.pdf [file d1cc00584g1.pdf]

## Supporting Information

### **The Energy Storage Behavior of a Phosphate-Based Cathode Material in Rechargeable Zinc Batteries**

Cuicui Li,<sup>a</sup> Wanlong Wu,<sup>a</sup> Hua-Yu Shi,<sup>a</sup> Zengming Qin,<sup>a</sup> Duo Yang,<sup>a</sup> Xianpeng Yang,<sup>a</sup> Yu Song,<sup>a</sup> Di Guo,<sup>a</sup> Xiao-Xia Liu<sup>a,b</sup> and Xiaoqi Sun<sup>\*a</sup>

<sup>a</sup> Department of Chemistry, Northeastern University, Shenyang, 110819, China

<sup>b</sup> Key Laboratory of Data Analytics and Optimization for Smart Industry (Northeastern University), Ministry of Education, Shenyang, 110819, China

\*Corresponding author

Email: sunxiaoqi@mail.neu.edu.cn

## Experimental Section

**Synthesis of the  $\text{Li}_3\text{V}_2(\text{PO}_4)_3/\text{rGO}$  composite:** The  $\text{Li}_3\text{V}_2(\text{PO}_4)_3/\text{rGO}$  composite was obtained using a previously reported method <sup>1</sup>. Typically, oxalic acid and  $\text{V}_2\text{O}_5$  (3:1 molar ratio) were dissolved in deionized water under magnetic stir at 70 °C. After a clear blue solution was formed, the stoichiometric  $\text{NH}_4\text{H}_2\text{PO}_4$  and  $\text{Li}_2\text{CO}_3$  were added to the solution. The GO suspension was also added. The mixture was stirred and sonicated, followed by drying in an oven at 100 °C to form a gel. The gel was heated at 350 °C for 4 h under argon, and the obtained product was ground. The powder was then pressed into pellets and sintered at 750 °C for 6 h under argon.

**Material characterization:** X-ray diffraction (XRD) patterns of the samples were measured using a PANalytical Empyrean diffractometer with Cu  $\text{K}\alpha$  radiation. The morphology and elemental contents were obtained using a scanning electron microscope (SEM) equipped with an energy dispersive X-ray spectroscopy (EDS) detector (HITACHI SU8010, Japan). The carbon content was obtained with a carbon sulfur analyzer (CS-200), and the weight percentage of rGO was 9.19%.

**Electrochemical measurement:** The cathodes were prepared by mixing  $\text{Li}_3\text{V}_2(\text{PO}_4)_3/\text{rGO}$  with super P and polyvinylidene fluoride (PVDF) with a weight ratio of 8:1:1 in N-methyl-2-pyrrolidone (NMP), drop casting on carbon paper substrate and drying at 60 °C in air then under vacuum. The diameter of the electrodes is 12 mm, and the area is 1.13  $\text{cm}^2$ . The mass loading of active material is around 2.0  $\text{mg cm}^{-2}$  or 2.3 mg per electrode. The 1 m  $\text{Zn}(\text{ClO}_4)_2/\text{H}_2\text{O}$  electrolyte was prepared by dissolving desired amount of  $\text{Zn}(\text{ClO}_4)_2 \cdot 6\text{H}_2\text{O}$  in water, while 1 m  $\text{Zn}(\text{ClO}_4)_2/\text{ACN}-11\%\text{H}_2\text{O}$  was obtained by dissolving desired amount of  $\text{Zn}(\text{ClO}_4)_2 \cdot 6\text{H}_2\text{O}$  in acetonitrile. The water content in the latter was confirmed to be 10.85% using a Mettler Toledo DL31 Karl Fischer Coulometer. To prepare the  $\text{Zn}(\text{ClO}_4)_2/\text{ACN}-3\%\text{H}_2\text{O}$  electrolyte, the  $\text{Zn}(\text{ClO}_4)_2 \cdot 6\text{H}_2\text{O}$  was dried at 100 °C under vacuum and dissolved in acetonitrile. The water content was measured to be 2.7%. The cathode, electrolyte, zinc foil anode and filter paper separators were assembled in CR2032-type coin cells in air. For the test in Li ion cells,  $\text{FePO}_4$  was obtained by electrochemical delithiation of  $\text{LiFePO}_4$ . The  $\text{FePO}_4$  electrode was prepared by mixing

FePO<sub>4</sub> with super P and polyvinylidene fluoride (PVDF) with a weight ratio of 7:2:1 in N-methyl-2-pyrrolidone (NMP). The obtained slurry was drop casted onto carbon paper and dried at 60 °C in vacuum. The mass loading of FePO<sub>4</sub> was more than four times of Li<sub>3</sub>V<sub>2</sub>(PO<sub>4</sub>)<sub>3</sub>. Galvanostatic charge/discharge tests were performed with a Land CT2001A battery cycler. Electrochemical impedance spectroscopy (EIS) was obtained in T-shaped PFA Swagelok 3-electrode cells with Zn as the counter and reference electrodes on the Bio-logic VMP3 potentiostat/galvanostat. The measurements were carried out in 3-electrodes to ensure the precise control of potential.

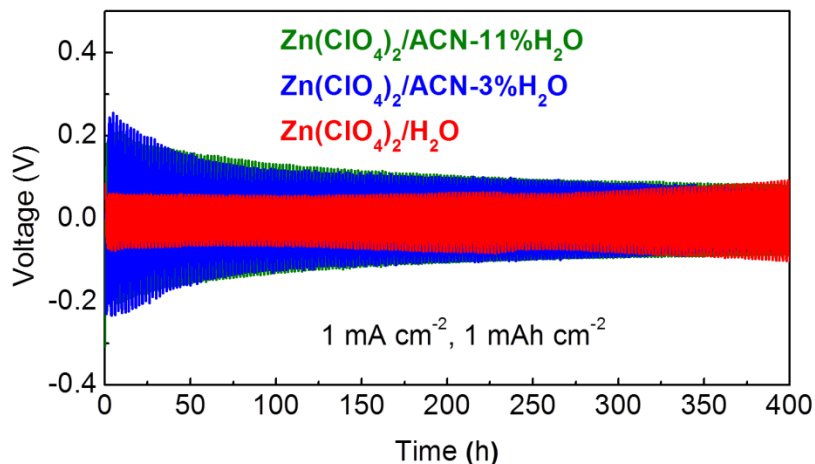

**Figure S1.** Zn plating/stripping tests in symmetric cells.

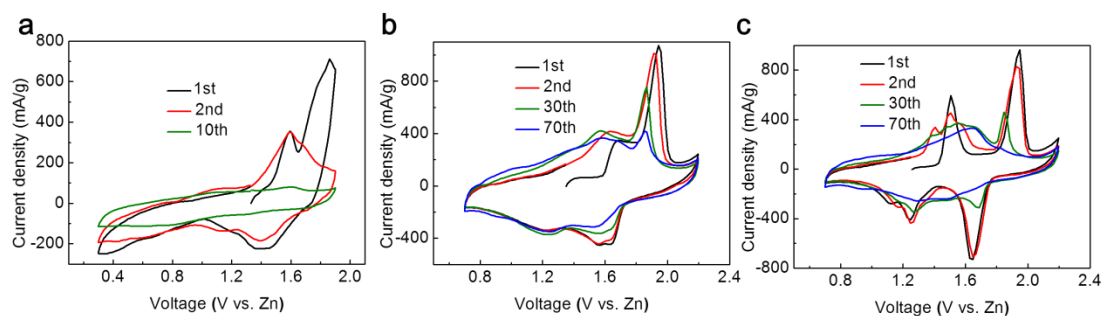

**Figure S2.** Cyclic voltammograms of  $\text{Li}_3\text{V}_2(\text{PO}_4)_3$  at  $0.5 \text{ mV s}^{-1}$  in the electrolytes of (a)  $\text{Zn}(\text{ClO}_4)_2/\text{H}_2\text{O}$ , (b)  $\text{Zn}(\text{ClO}_4)_2/\text{ACN}-3\%\text{H}_2\text{O}$ , (c)  $\text{Zn}(\text{ClO}_4)_2/\text{ACN}-11\%\text{H}_2\text{O}$ .

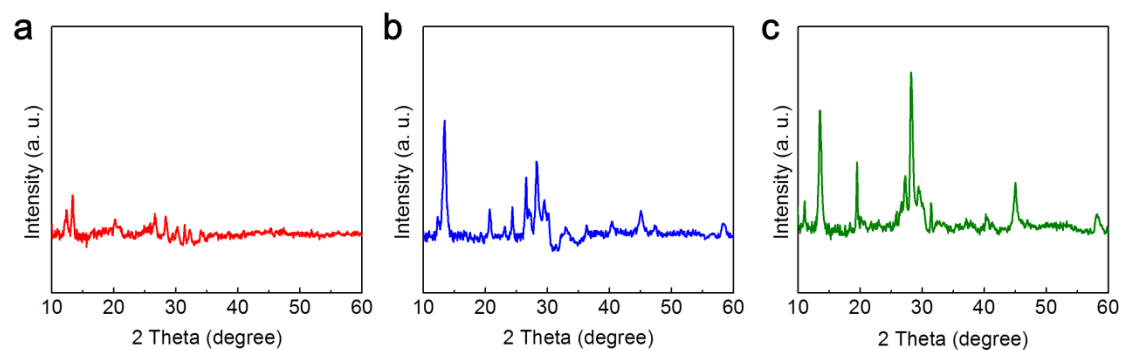

**Figure S3.** XRD of the  $\text{Li}_3\text{V}_2(\text{PO}_4)_3$  electrode after running at 2C for 200 cycles in (a)  $\text{Zn}(\text{ClO}_4)_2/\text{H}_2\text{O}$ , (b)  $\text{Zn}(\text{ClO}_4)_2/\text{ACN}-3\%\text{H}_2\text{O}$  and (c)  $\text{Zn}(\text{ClO}_4)_2/\text{ACN}-11\%\text{H}_2\text{O}$  electrolytes.

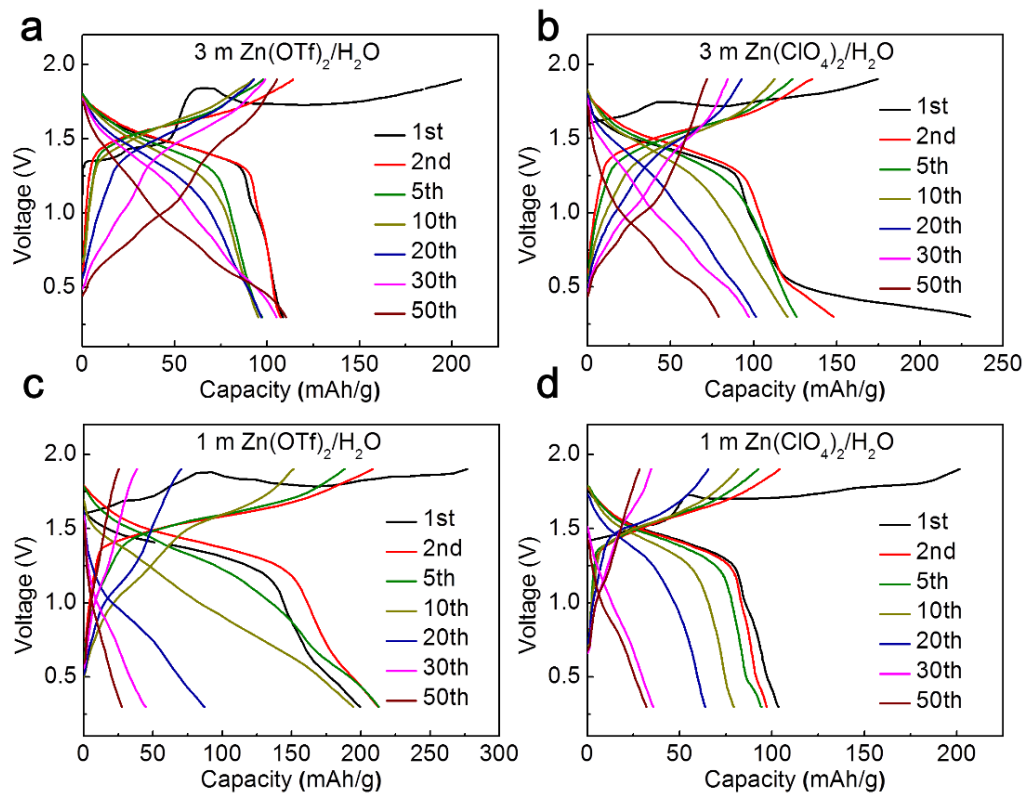

**Figure S4.** Voltage profiles of  $\text{Li}_3\text{V}_2(\text{PO}_4)_3$  in (a) 3 m  $\text{Zn}(\text{OTf})_2$ , (b) 3 m  $\text{Zn}(\text{ClO}_4)_2$ , (c) 1 m  $\text{Zn}(\text{OTf})_2$  and (d) 1 m  $\text{Zn}(\text{ClO}_4)_2$  aqueous electrolytes at 2C during different cycles.

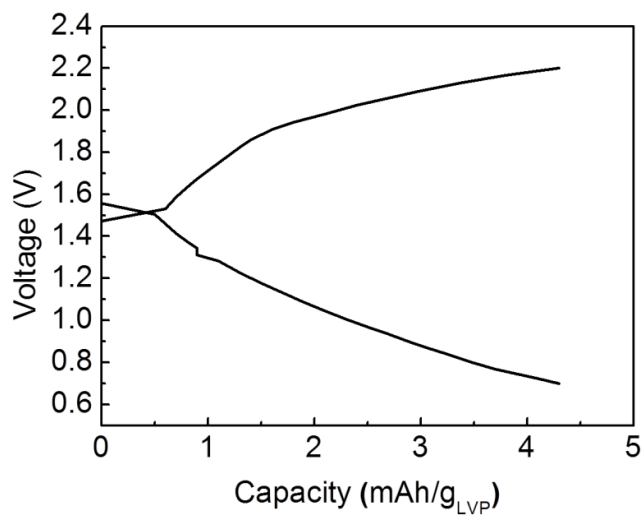

**Figure S5.** Voltage profile of bare carbon paper in the  $\text{Zn}(\text{ClO}_4)_2/\text{ACN}-11\%\text{H}_2\text{O}$  electrolyte at 1C (mass based on the average loading of  $\text{Li}_3\text{V}_2(\text{PO}_4)_3$ ).

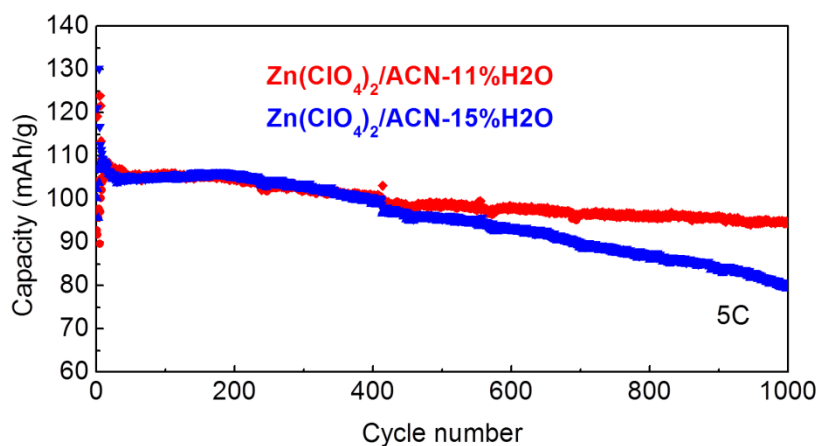

**Figure S6.** Cycling performance of  $\text{Li}_3\text{V}_2(\text{PO}_4)_3$  in the  $\text{Zn}(\text{ClO}_4)_2/\text{ACN}-11\%\text{H}_2\text{O}$  and  $\text{Zn}(\text{ClO}_4)_2/\text{ACN}-15\%\text{H}_2\text{O}$  electrolytes at 5C.

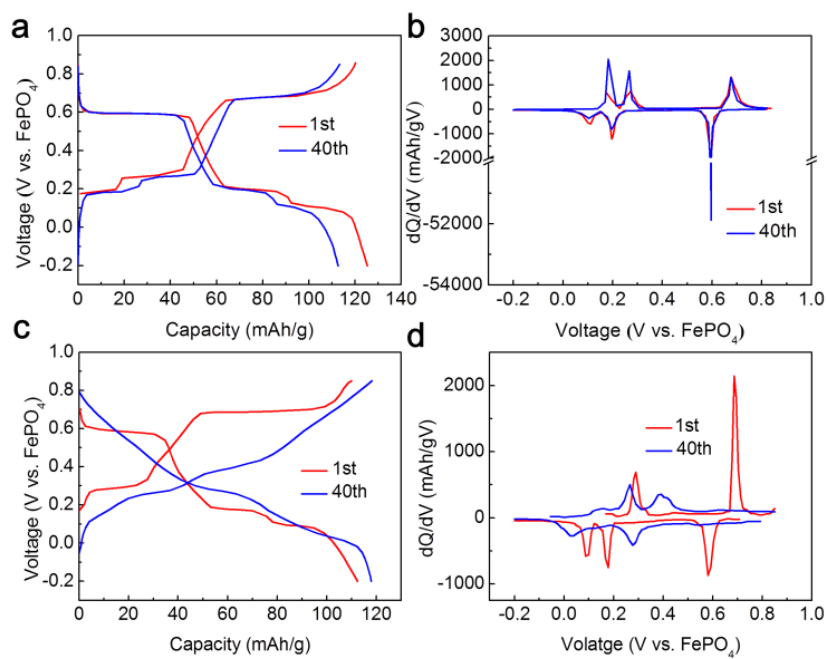

**Figure S7.** The charge/discharge and differential capacity curves of  $\text{Li}_3\text{V}_2(\text{PO}_4)_3$  in the (a,b)  $\text{LiClO}_4/\text{ACN}$  and (c,d)  $\text{LiClO}_4/\text{ACN}-11\%\text{H}_2\text{O}$  electrolytes.

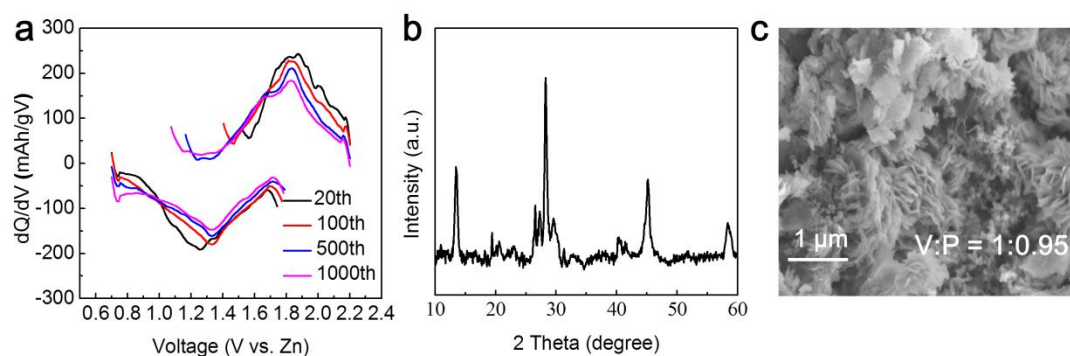

**Figure S8.** (a) The differential capacity curves of  $\text{Li}_3\text{V}_2(\text{PO}_4)_3$  in zinc cells with the  $\text{Zn}(\text{ClO}_4)_2/\text{ACN}-11\%\text{H}_2\text{O}$  electrolyte at 5C. (b) XRD pattern and (c) SEM image of the electrode after 1000 cycles.

**Table S1.** The EIS fitting results

| Electrolyte                                                   | $R_s$ (ohm) | $R_{ct}$ (ohm) |
|---------------------------------------------------------------|-------------|----------------|
| $\text{Zn}(\text{ClO}_4)_2/\text{ACN}-11\%\text{H}_2\text{O}$ | 4.8         | 55.7           |
| $\text{Zn}(\text{ClO}_4)_2/\text{ACN}-3\%\text{H}_2\text{O}$  | 6.9         | 201.5          |

## Reference

- 1 M. J. Park, H. Yaghoobnejad Asl, S. Therese and A. Manthiram, *J. Mater. Chem. A*, 2019, **7**, 7159-7167.
